# Supplementary material
Source: MDPI journal article supplement (https://www.mdpi.com/2073-445X/11/1/100)

NDVI anomaly 2000

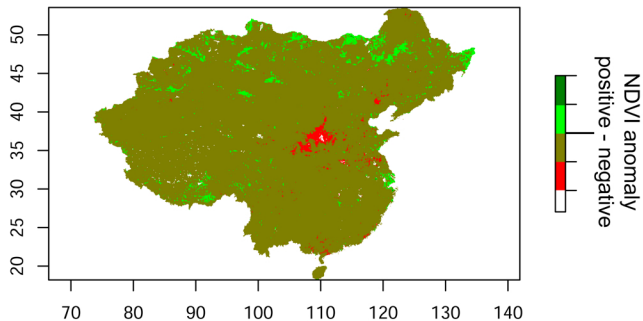

NDVI anomaly 2001

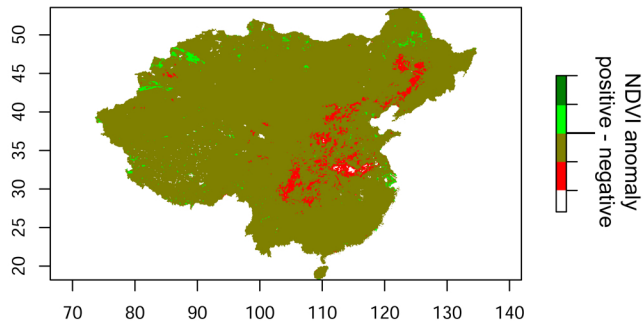

NDVI anomaly 2002

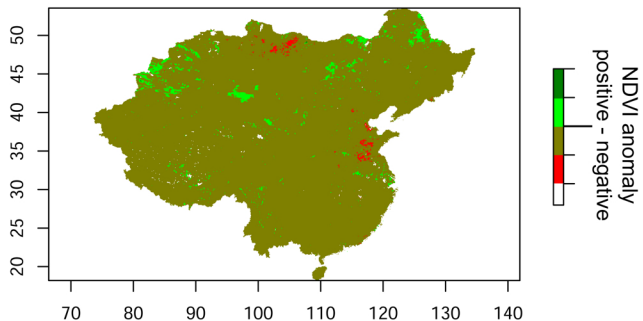

NDVI anomaly 2003

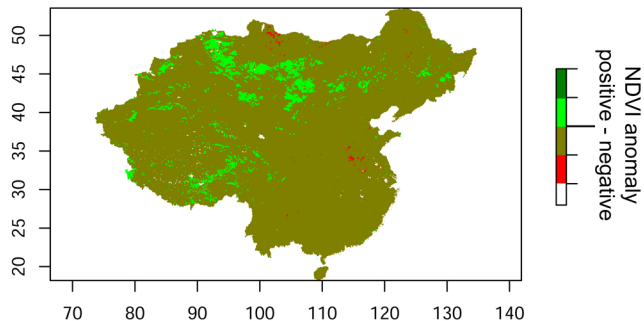

NDVI anomaly 2004

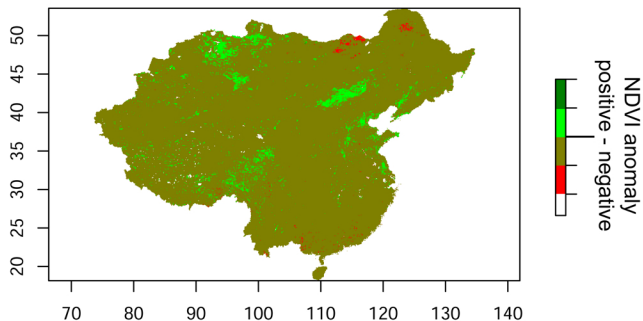

NDVI anomaly 2005

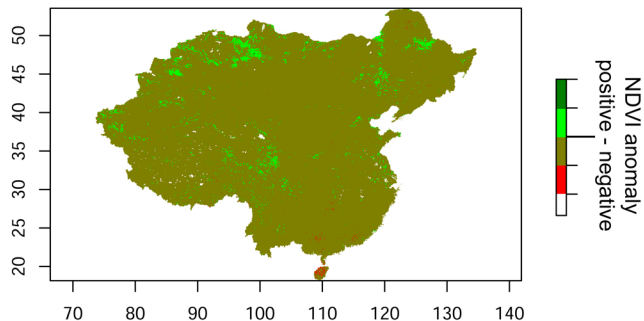

NDVI anomaly 2006

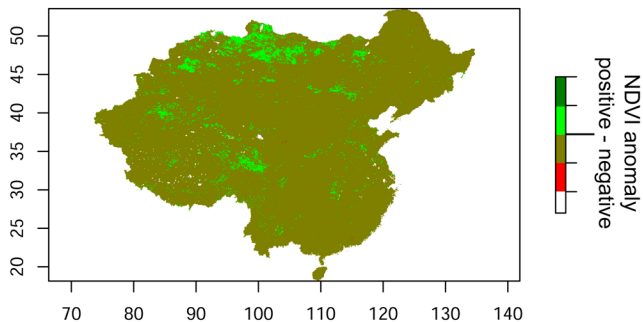

NDVI anomaly 2007

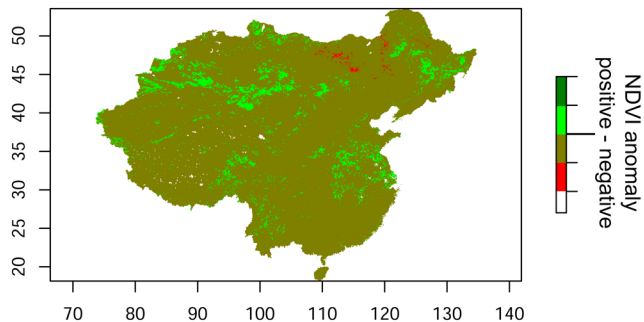

NDVI anomaly 2008

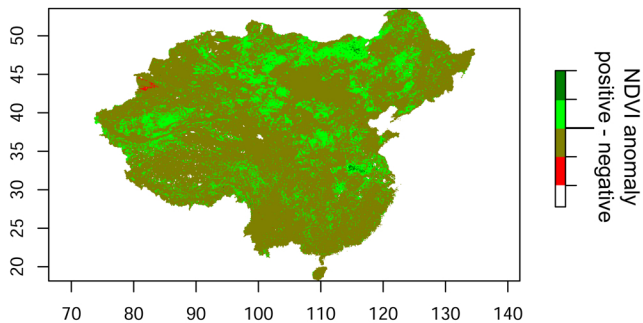

NDVI anomaly 2009

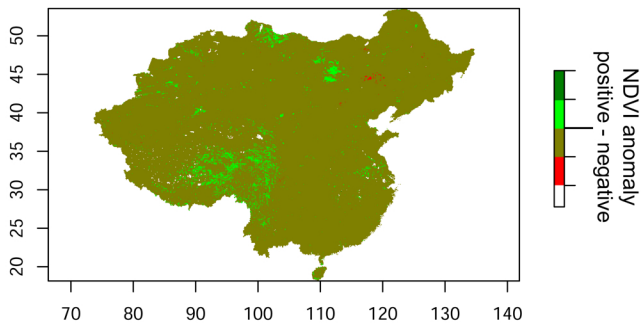

NDVI anomaly 2010

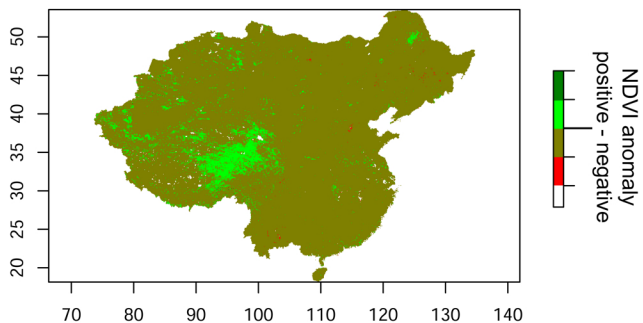

NDVI anomaly 2011

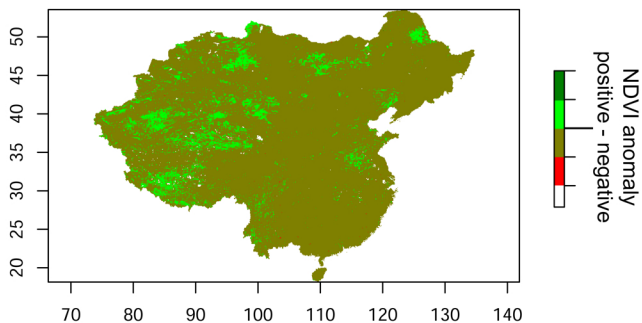

NDVI anomaly 2012

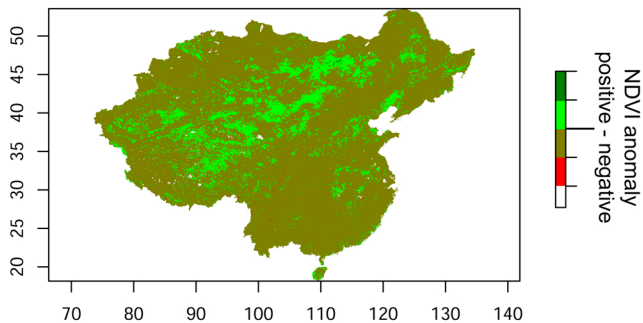

NDVI anomaly 2013

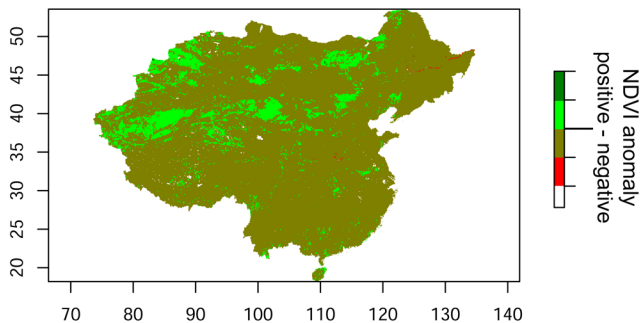

NDVI anomaly 2014

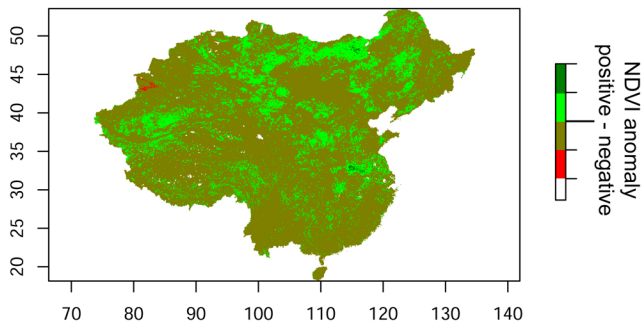

NDVI anomaly 2015

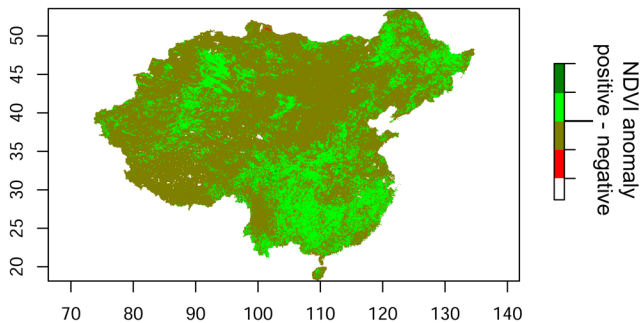

NDVI anomaly 2016

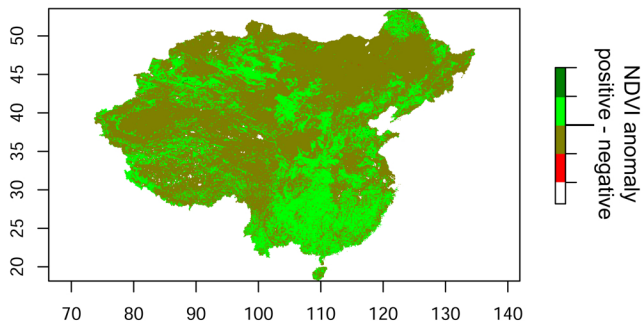

NDVI anomaly 2017

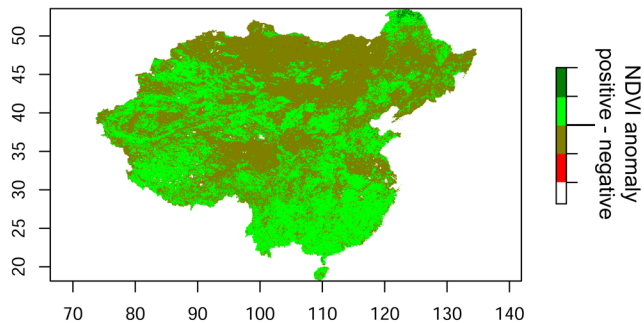

NDVI anomaly 2018

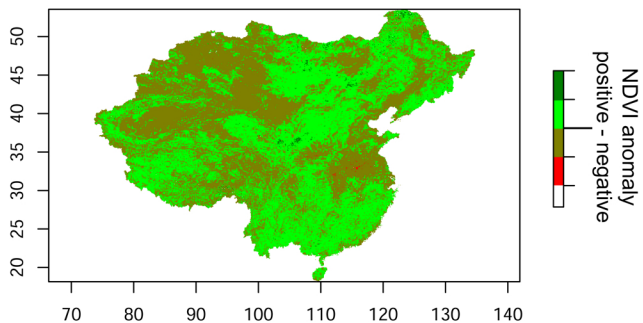

NDVI anomaly 2019

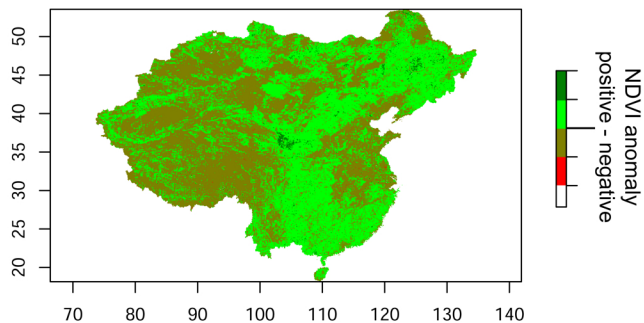

NDVI anomaly 2020

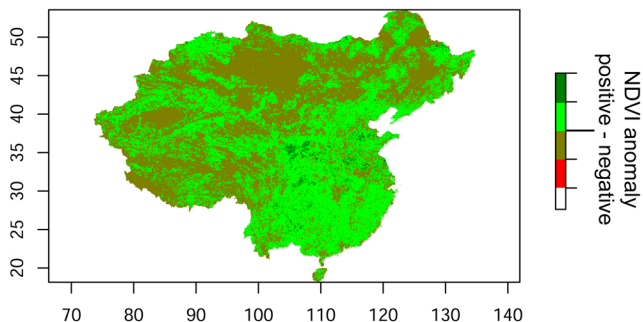

NDVI anomaly time series  
2000 - 2020

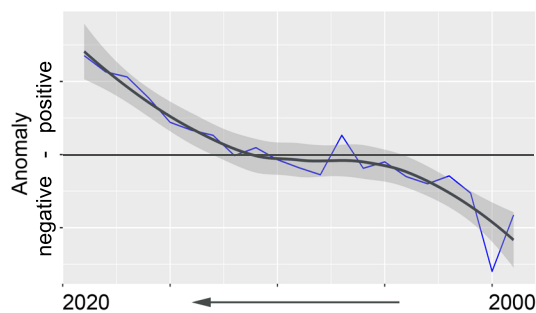

**2000**

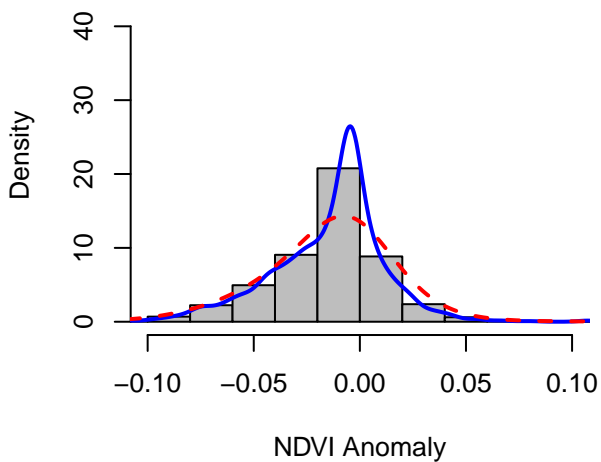

**2001**

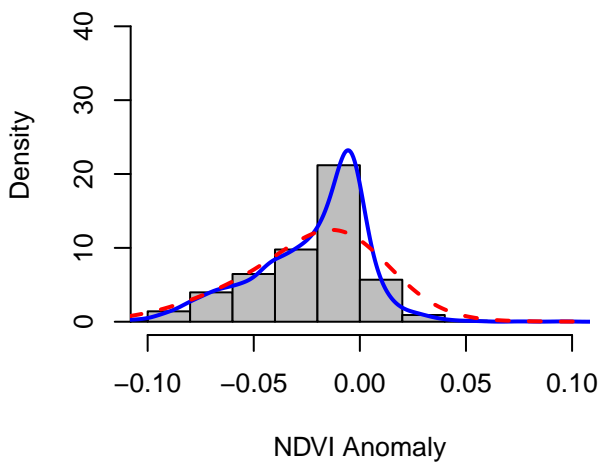

**2002**

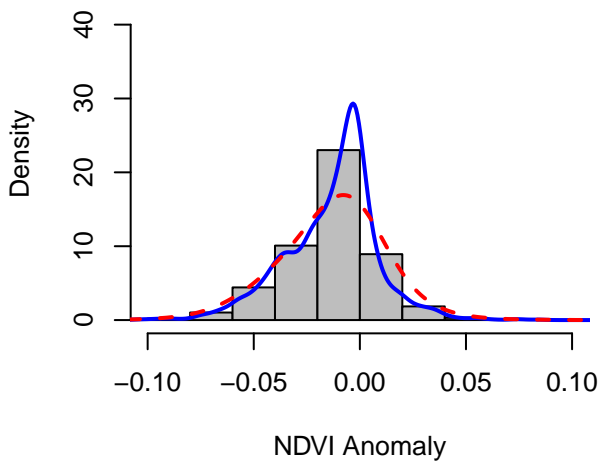

**2003**

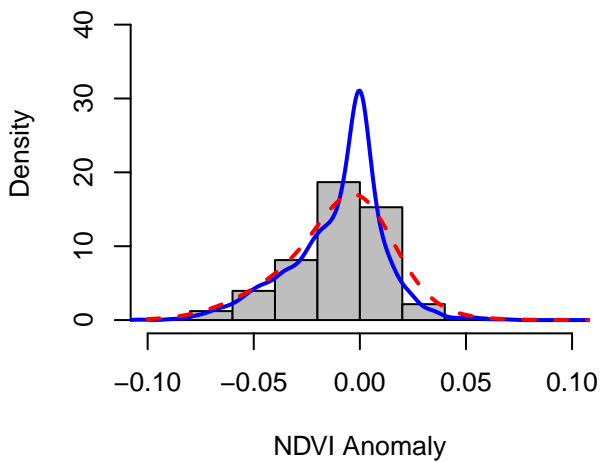



**2004**

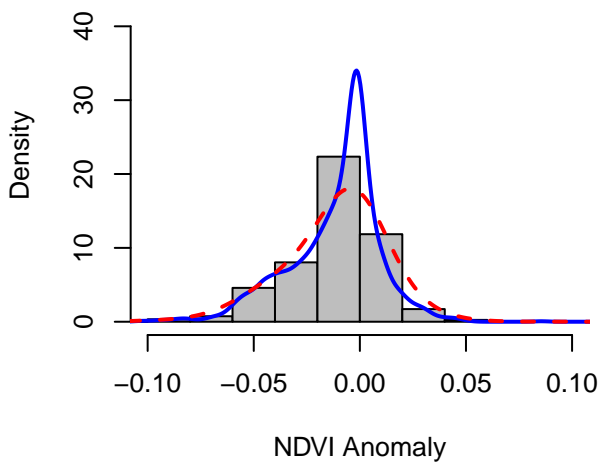

**2005**

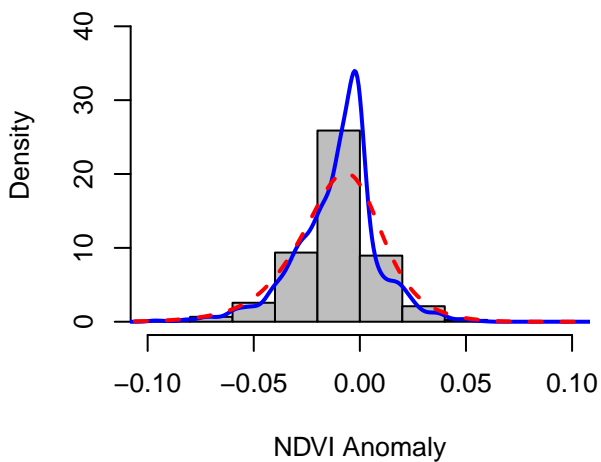

**2006**

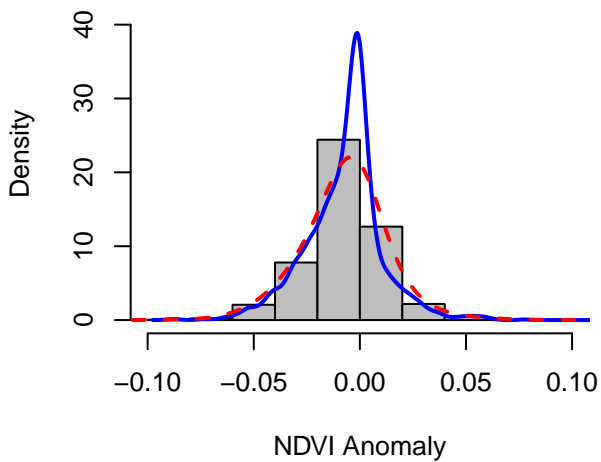

**2007**

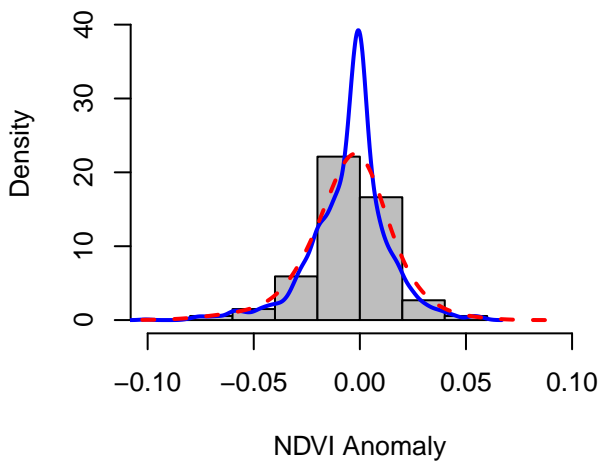

**2008**

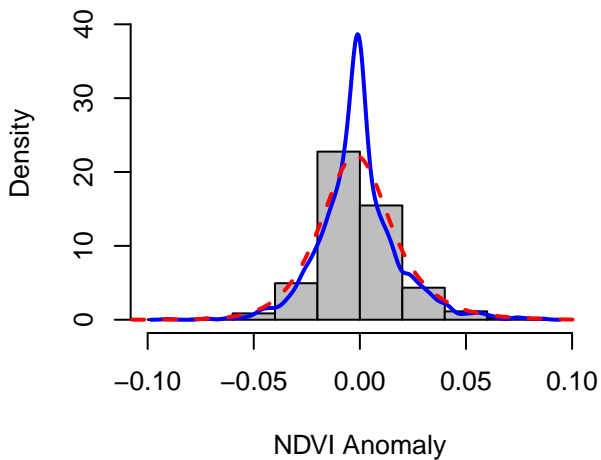

**2009**

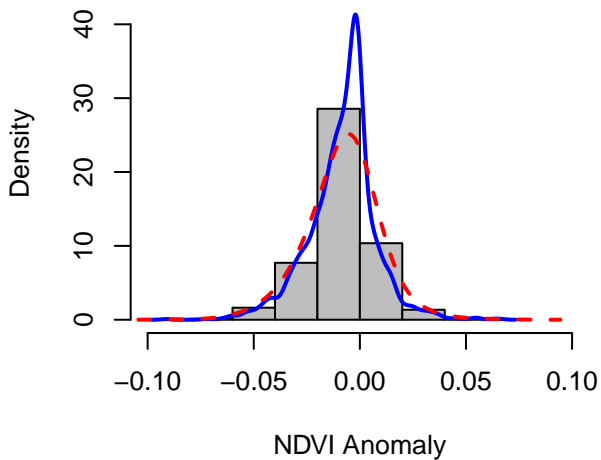

**2010**

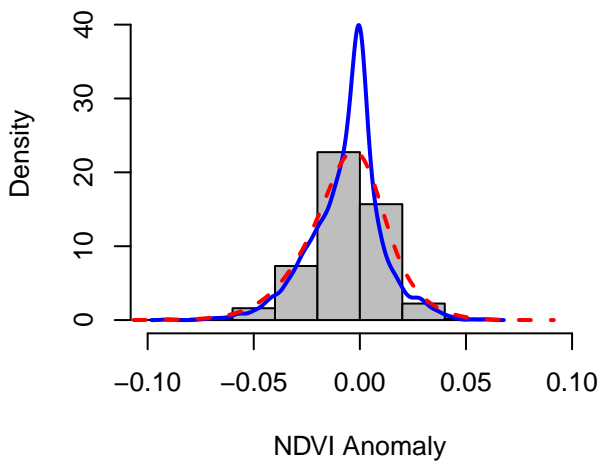

**2011**

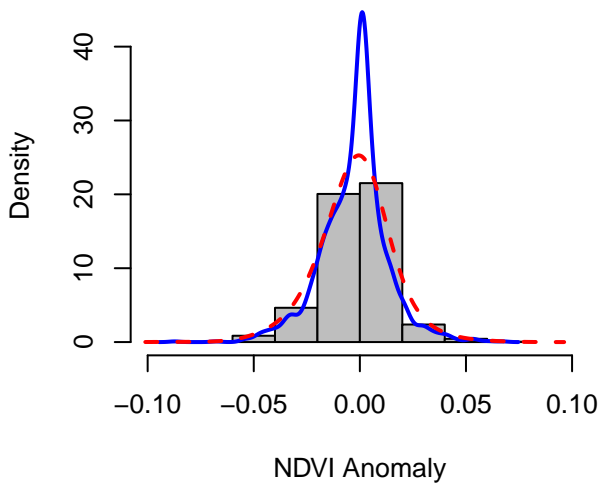

**2012**

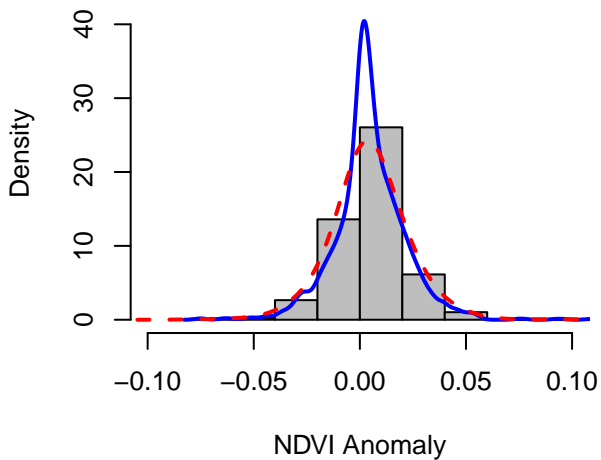

**2013**

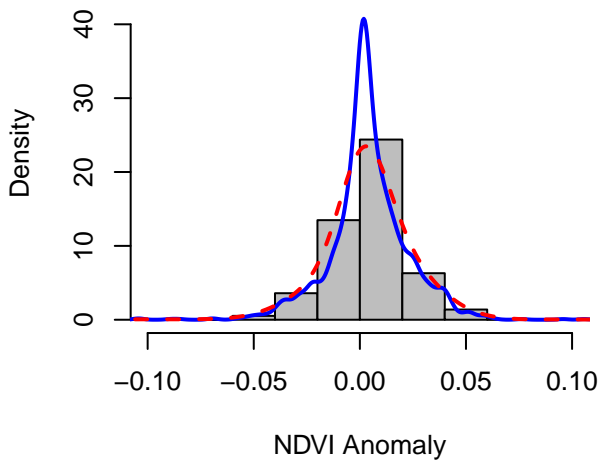

**2014**

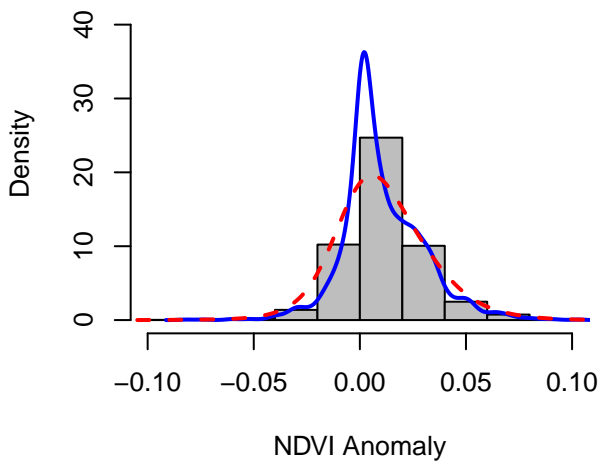

**2015**

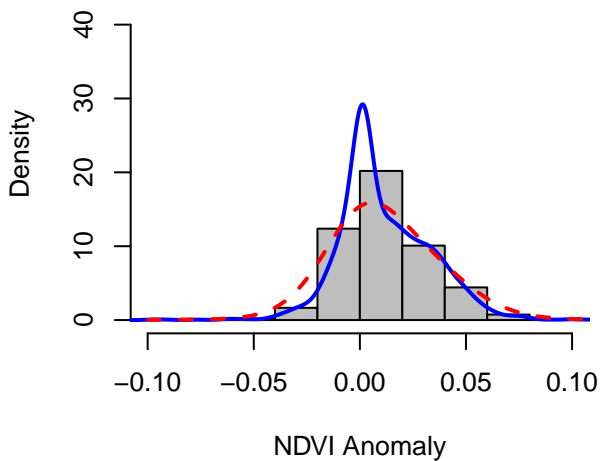

**2016**

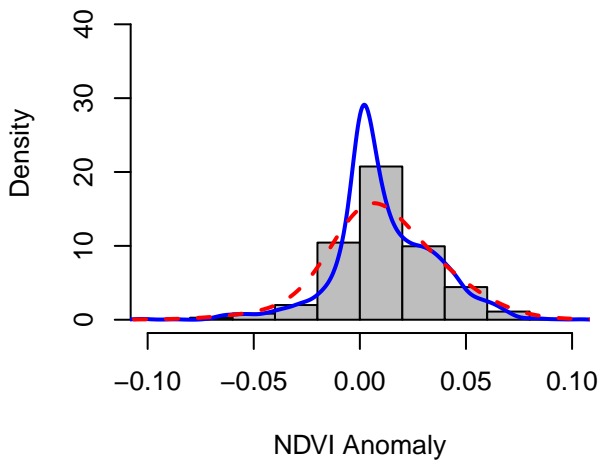

**2017**

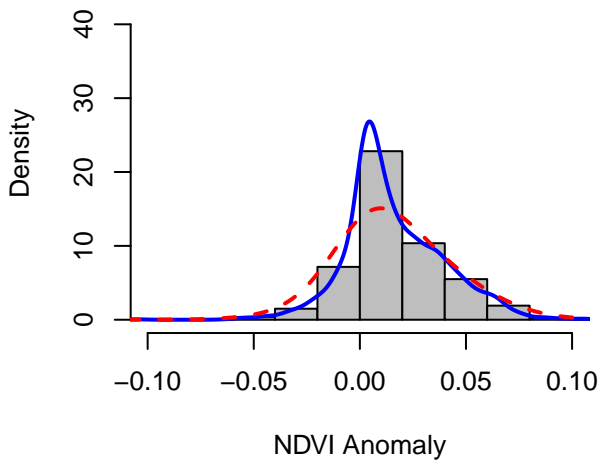

**2018**

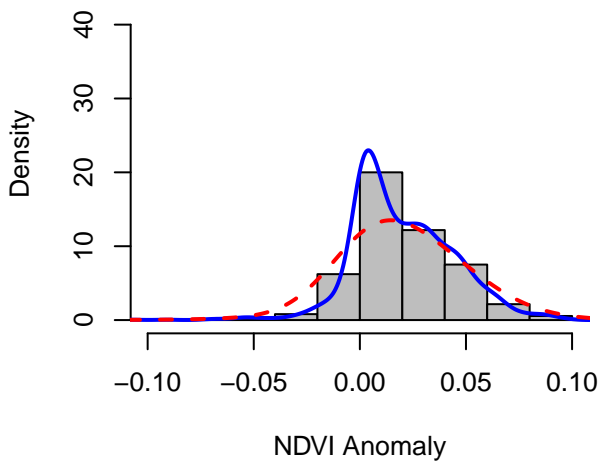

**2019**

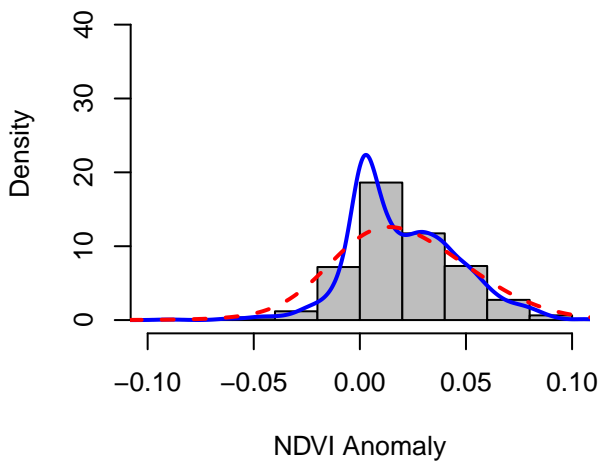

**2020**

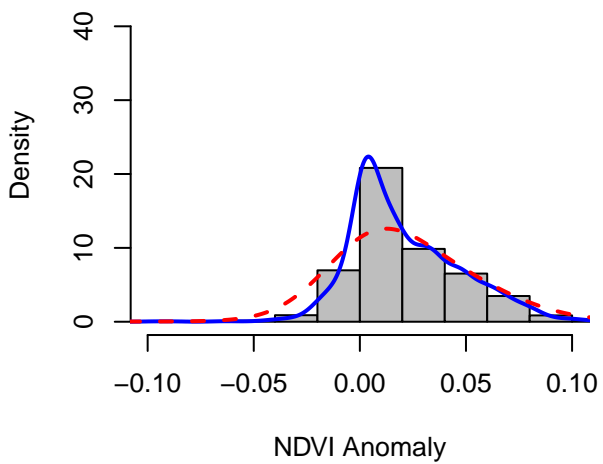

Supplement: s1 [file s1]
